1 **Langerhans islets induce anti-tumor immunity at the expense of glycemic control and**  
2 **predict chemotherapy response in pancreatic cancer**

3  
4 Azaz Ahmed<sup>1,2</sup>, Pornpimol Charoentong<sup>1,3</sup>, Rosa Klotz<sup>4</sup>, Sophia Köhler<sup>1</sup>, Meggy Suarez-  
5 Carmona<sup>2</sup>, Nektarios A. Valous<sup>3</sup>, Dyke Ferber<sup>1</sup>, Mathias Heikenwälder<sup>5</sup>, Nathalia Giese<sup>4</sup>, Thilo  
6 Hackert<sup>4</sup>, Fee Klupp<sup>4</sup>, Martin Schneider<sup>4</sup>, Thomas Schmidt<sup>4</sup>, Christoph Springfeld<sup>1</sup>, Yakup  
7 Tanriver<sup>6,7</sup>, Christine S. Falk<sup>8</sup>, Laurence Zitvogel<sup>9,10</sup>, Inka Zörnig<sup>1,3</sup>, Dirk Jäger<sup>1,3</sup>, Niels Halama<sup>1,2</sup>

8  
9 <sup>1</sup>Medical Oncology and Internal Medicine VI, National Center for Tumor Diseases (NCT), University Hospital  
10 Heidelberg, University Heidelberg, 69120 Heidelberg, Germany

11 <sup>2</sup>Translational Immunotherapy, German Cancer Research Center (DKFZ), 69120 Heidelberg, Germany

12 <sup>3</sup>Applied Tumor Immunity Clinical Cooperation Unit, National Center for Tumor Diseases (NCT), German  
13 Cancer Research Center (DKFZ), 69120 Heidelberg, Germany

14 <sup>4</sup>General, Visceral and Transplantation Surgery, University Hospital Heidelberg, University Heidelberg,  
15 69120 Heidelberg, Germany

16 <sup>5</sup>Chronic Inflammation and Cancer, German Cancer Research Center (DKFZ), 69120 Heidelberg, Germany

17 <sup>6</sup>Medical Microbiology and Hygiene, University of Freiburg, 79106 Freiburg, Germany

18 <sup>7</sup>Nephrology, Medical Center-University of Freiburg, 79106 Freiburg, Germany

19 <sup>8</sup>Institute of Transplant Immunology, Hannover Medical School, 30625 Hannover, Germany

20 <sup>9</sup>Université Paris XI, 91190 Saint-Aubin, France

21 <sup>10</sup>INSERM U1015, Institut Gustave Roussy, 94800 Villejuif, France

22

23

24

25

26

27

28

29

30

31

32

33 **Correspondence to:**

34 Niels Halama, MD

35 Translational Immunotherapy

36 German Cancer Research Center (DKFZ)

37 Im Neuenheimer Feld 242

38 69120 Heidelberg, Germany

39 phone: +49 6221 5638397

40 fax: + 49 6221 567030

41 email: niels.halama@nct-heidelberg.de

42 **ABSTRACT**

43 Induction of anti-tumor immunity in pancreatic ductal adenocarcinoma (PDA) is an unresolved  
44 challenge. Systematic investigation of the microenvironment of primary pancreatic tumors  
45 revealed a role of endocrine Langerhans islets in the coordination of immune activation. We found  
46 that intratumoral  $\beta$ -cells, regulated via STAT3, secrete C-C motif chemokine ligand 27 (CCL27)  
47 and thereby promote a  $T_H1$  phenotype in the microenvironment resulting in an enhanced T cell  
48 infiltration and prolonged patient survival. The local effect can be abrogated in a patient-based  
49 human explant model by inhibition of the CCL27 receptor CCR10. This defense mechanism is  
50 paralleled by an impaired metabolic function of Langerhans islets with reduced insulin levels  
51 resulting in a dysregulation of glycemic control in patients. Based on these findings, screening of  
52 PDA cases (n= 2264) led to the identification of type 2 diabetes mellitus (T2DM) and extractable  
53 glycated haemoglobin (HbA1c) levels as response markers for neoadjuvant chemotherapy with  
54 fluorouracil, leucovorin, irinotecan and oxaliplatin (FOLFIRINOX). Collectively these data provide  
55 insights into the interconnection of T2DM and PDA, and link declining glycemic control to  
56 therapeutic efficacy, which can be utilized as a tool for clinical decision-making and improve patient  
57 management.

## 58 INTRODUCTION

59 Pancreatic ductal adenocarcinoma (PDA) is the seventh-leading cause of cancer-related death  
60 worldwide, with a 5-year survival of only 9% and the highest incidence-to-mortality ratio of any  
61 solid cancer<sup>1</sup>. Over the past decade, not only has the involvement of immune system in  
62 malignancies emerged as a critical hallmark of cancer<sup>2</sup>, but immunotherapy has also profoundly  
63 changed cancer treatment by improving survival of patients in multiple solid tumors. A major  
64 predictor of clinical response to immunotherapy is the extent of intratumoral T cell infiltration.  
65 However, such “hot” tumors (high T cell infiltration) stand in contrast to “cold” tumors (low T cell  
66 infiltration) like PDA, which remains mostly refractory to immunotherapeutic treatment regimens<sup>3</sup>.  
67 A main feature of the tumor tissue in PDA is its desmoplastic microenvironment, in which immune  
68 cells make up nearly 50% of the cellular components but only few of them are anti-tumor effector  
69 cells such as CD8<sup>+</sup> T lymphocytes<sup>4</sup>. Human studies have shown that paucity of T cells is common  
70 in PDA, but a subset of primary tumors do exhibit moderate infiltration of CD4<sup>+</sup> or CD8<sup>+</sup> T cells,  
71 and their sheer presence correlates with expression of cytotoxicity genes and overall survival<sup>5-8</sup>.  
72 Induction of such an anti-tumor immunity can be induced, for example, by chemotherapy with  
73 fluorouracil, leucovorin, irinotecan and oxaliplatin (FOLFIRINOX) by increasing cytotoxic T cell  
74 densities. To further improve patient outcomes, we need to understand the role of the components  
75 defining the tumor microenvironment and identify critical immunomodulatory mechanisms<sup>9-11</sup>.

76 In this regard, little is known about the role of endocrine Langerhans islets in shaping the  
77 tumoral immune landscape. Previous studies describe multiple proinflammatory cytokines  
78 originating from Langerhans islets in metabolic disorders such as obesity and diabetes<sup>12,13</sup>. Also,  
79 Langerhans islets are mainly responsible for chemokine-mediated inflammation and T cell  
80 infiltration in type 1 diabetes mellitus<sup>14</sup> and evidence suggests that this patient cohort is protected  
81 against PDA<sup>15</sup>. But what phenotype do Langerhans islets exhibit in the immune contexture of PDA?  
82 And is it clinically relevant? In addition, an impaired glycemic control is a common finding and  
83 several studies have shown a high incidence of type 2 diabetes mellitus (T2DM) in PDA patients<sup>16</sup>  
84 but it remains unclear whether T2DM is a risk factor or early marker of the disease<sup>17-19</sup>.

85 This study aimed to systematically assess the tumor microenvironment and subsequently  
86 decipher immunologic interactions in PDA patients. This led to the in-depth investigation of anti-  
87 tumoral immunomodulatory capacities of Langerhans islets, their consequences for glycemic  
88 control and their impact on clinical outcomes, in order to tailor therapeutic strategies by exploiting  
89 metabolic parameters as a stratification marker.

## 90 **MATERIAL AND METHODS**

### 91 **Patient samples and clinical analyses**

92 All patients underwent planned surgery at the department for General, Visceral and  
93 Transplantation Surgery at the University Hospital Heidelberg. The study was approved by the  
94 local ethics committee (301/2001 and S-457/2019). Written informed consent was obtained from  
95 all patients. Tissue samples of 61 PDA patients were used for immunohistochemistry and cytokine  
96 analyses. 9 fresh PDA tissues on ice were directly collected from the operating room from patients  
97 who underwent surgery in 2019 and 2020. Survival analyses were performed on a set of 51  
98 patients with PDA. Clinical information about diagnosis of T2DM, HbA1c levels and neoadjuvant  
99 treatment with FOLFIRNOX was collected in a cohort of 2264 patients, which is the total number  
100 of patients which was planned for pancreatoduodenectomy from 2016-2020 in the University  
101 Hospital Heidelberg. 122 patients were included in the final analysis. All patient data and samples  
102 were collected in a prospective database and analyzed retrospectively. All patient data was  
103 pseudonymized.

104

### 105 **Patient-based organotypic tumor explant model**

106 The organotypic tumor explant model was set up as previously described<sup>20</sup>. In brief, resected  
107 specimens were transferred on ice and under sterile conditions from the operating room to the  
108 laboratory. The timeframe was less than thirty minutes upon resection. The resected specimen  
109 was immediately processed into serial explant-suitable thin tissue sections (size approximately 6  
110 x 6 x 1 mm). From each patient, one or more samples were directly frozen as well as formalin-  
111 fixed and embedded in paraffin for reference purposes. Tissue culture was performed by placing  
112 two explants with 1 ml of Minimum Essential Medium with 1% GlutaMAX supplement (Gibco, USA;  
113 41090-036) per well on a 24-well plate in an incubator at 37°C and 5% CO<sub>2</sub>. The explants were  
114 treated with a small molecule inhibitor of CCR10 (BI-6901) from (Boehringer Ingelheim, Germany).  
115 The CCR10 antagonist dosage per well was 0.1 mg/ml. Along with untreated explants (reference),  
116 the treated specimens were harvested after 24 hours and cryo-preserved using cryo embedding  
117 medium (Mediate, USA; 41-3011-00) as well as formalin-fixed and embedded in paraffin.

118

### 119 **Cell Culture of human pancreatic Langerhans islets**

120 Human pancreatic Langerhans islet cells were purchased from (Celprogen, USA; 35002-04). The  
121 cells were seeded at 80% of confluence and plated at 10<sup>5</sup> per ml density. The cells were  
122 maintained in the appropriate size, extra-cellular matrix precoated flasks (Celprogen, USA; 35002-  
123 04-T75) and cultured in complete growth medium with serum (Celprogen, USA; M35002-04S).  
124 Medium was changed every 24 hours. When reached 65-75% of confluence, cells were passaged  
125 with 0,05% Trypsin-EDTA (Gibco, USA; 25300-054) and subcultured for expansion. Langerhans  
126 islet cells from passages 3 to 5 were used for the experiments.

127

### 128 **Immunohistochemistry on human tissue samples**

129 PDA tissue samples were collected freshly from the operating room, fixed in 4% phosphate  
130 buffered formaldehyde (ROTI Histofix, Roth, Germany; P087), placed in ethanol and embedded in  
131 paraffin. Tissue samples were sliced in 3 µm thick sections. All immunohistochemical stainings  
132 were performed on a BOND-MAX (Leica, Germany). FFPE tissues were deparaffinized and  
133 rehydrated (BOND Dewax Solution, Leica, Germany; AR9222). After heat-induced epitope  
134 retrieval (HIER) at 100°C (BOND Epitope Retrieval Solution 1 or 2, Leica, Germany; HIER 1  
135 AR9961, HIER 2 AR9640), endogenous peroxidase activity was blocked by incubation with 3%  
136 peroxide block for 20 minutes (BOND Polymer Refine Detection System, Leica, Germany;  
137 DS9800). The sections were blocked with 10% normal goat serum (Vector, USA; S-1000-20). The  
138 primary antibodies were applied at room temperature for 30 minutes: CD3 (1:100, HIER 1, rabbit  
139 monoclonal, clone SP7, Abcam, UK; ab16669), CD4 (1:100, HIER 1, mouse monoclonal, clone  
140 4B12, Leica, Germany; CD4-368-L-CE-H), CD8 (1:50, HIER 1, mouse monoclonal, clone 4B11,  
141 Leica, Germany, CD8-4B11-L-CE), CD20 (1:100, HIER 1, mouse monoclonal, clone L26, Leica,  
142 Germany; CD20-L26-L-CE), CD163 (1:500, HIER 2, rabbit monoclonal, clone EPR19518, Abcam,  
143 UK; ab182422), NKp46 (1:175, HIER 1, monoclonal mouse, clone 195314, R&D Systems, USA;  
144 MAB1850-500), FoxP3 (1:100, HIER 2, mouse monoclonal, clone 236A/E7, Thermo Fisher  
145 Scientific, Germany; 14-4777), CCL27 (1:200, HIER 1, mouse monoclonal, clone 124308, R&D  
146 Systems, USA; MAB376), CCR10 (1:100, HIER 1, rabbit polyclonal, Novus Biologicals, USA;  
147 NB100-56319), CA19-9 (1:1000, HIER 1, mouse monoclonal, clone 121SLE, Abcam, UK;  
148 ab3982), insulin (1:500000, rabbit monoclonal, clone EPR17359, Abcam, UK; ab181547),  
149 Phospho-Stat3 (Ser727) (1:200, HIER 2, mouse monoclonal, Cell Signaling Technology, USA;  
150 9136S). The slides were incubated with a secondary antibody (rabbit anti-mouse IgG, BOND  
151 Polymer Refine Detection System, Leica, Germany, DS9800) for 8 minutes at room temperature.  
152 Signal amplification was performed by incubation with horse radish peroxidase and coupled to  
153 dextrane molecules in large numbers, for 8 minutes at room temperature (Poly-HRP-mouse anti-  
154 rabbit IgG, BOND Polymer Refine Detection System, Leica, Germany; DS9800). A color reaction  
155 with 3,3-di-amino-benzidine (DAB chromogen, BOND Polymer Refine Detection System; DS9800)  
156 was utilized to detect the antigen. Counterstaining was performed with haematoxylin (BOND  
157 Polymer Refine Detection System, Leica, Germany; DS9800) and the sections were mounted with  
158 Aquatex (Merck, Germany; 108562).

159

## 160 **Immunofluorescence on human tissue samples**

161 Immunofluorescence double staining was performed on paraffin-embedded sections using  
162 fluorochrome-conjugated secondary antibodies. For the first primary antibodies CD3, CD4, CD8  
163 and FoxP3 a red fluorescence Alexa Fluor 594 donkey anti-mouse IgG (Thermo Fisher Scientific,  
164 Germany; A-21203) was used, and for CCR10 a green fluorescence Alexa 488 goat anti-rabbit  
165 IgG (Thermo Fisher Scientific, Germany; A-11008). For the analysis of the first primary antibody  
166 CCL27 and Phospho-Stat3 (Ser727) a green Alexa Fluor 488 goat anti-mouse IgG (Thermo Fisher  
167 Scientific, Germany; A-11029) was used, and for insulin a red Alexa Fluor 594 donkey anti-rabbit

168 IgG (Thermo Fisher Scientific, Germany; A-21207). The sections were stained according to  
169 antibody recommendation. After incubation of the first primary antibody overnight at 4°C, Alexa  
170 Fluor 488 (1:100 dilution) was applied for 60 minutes. The second primary antibody was applied  
171 for 180 minutes at room temperature and detected with Alexa Fluor 594 (1:100 dilution) for 60  
172 minutes during sequential double staining. Mounting and staining for cell nuclei was performed  
173 using Vectashield with DAPI (1:10000, Vector, USA; H-1200). Images were taken with a  
174 Nanozoomer 2.0-HT slide scanner (Hamamatsu, Japan).

175

#### 176 **Whole-slide immune cell quantification**

177 For quantification analysis of immune cells, tissue sections were digitized with a Leica Aperio AT2  
178 scanner (Leica, Germany). Whole-slide microscopic images of full tissue sections were  
179 automatically obtained (virtual microscopy). The slides were scanned at 40-fold magnification and  
180 further examined using an image analysis software (VIS software suite, Visiopharm, Denmark).  
181 Given regions of interests (tumor and stroma) were manually annotated and density and  
182 distribution of immune cells was analyzed semi-automatically, as reported previously<sup>21-23</sup>. A visual  
183 consistency check was performed on all evaluations.

184

#### 185 **Laser capture microdissection**

186 The tumoral and stromal compartment on PDA tissue sections was separated from each other by  
187 laser capture microdissection. This technique permits to isolate selected human cell populations  
188 from a section of complex tissue under direct microscopic visualization. The standard protocols of  
189 the inventors were used<sup>24</sup>. In brief, the tissue section was focused (20-fold magnification) and the  
190 tumoral and stromal area was manually separated using the Leica Laser Microdissection Software  
191 (Leica, Germany); the dissection was completed using a carbon dioxide laser pulse.

192

#### 193 **Multiplex protein quantification of cytokines and metabolic hormones**

194 Small pieces of dissected frozen pancreatic tumor tissues were collected and lysed (Bio-Plex Cell  
195 Lysis Kit, BioRad, USA; 171304011), followed by a repeated procedure of vortexing, freezing (-  
196 80°C for 10 minutes), thawing (on ice) and ultrasonic bathing (for 10 minutes). The supernatants  
197 were then centrifuged at 13.000 rpm for 20 minutes at 4°C. When supernatants of cell culture  
198 experiments were analyzed no lysis was performed. In all samples, the protein concentrations  
199 were determined (Pierce BCA Protein Assay, Thermo Fisher Scientific, Germany; 23227), the  
200 concentration then was adjusted to 200 µg/ml and cytokine as well as metabolic hormone  
201 concentrations were quantified by multiplex protein arrays, according to the instructions of the  
202 manufacturer (BioRad, USA). A two-laser array reader simultaneously quantifies all proteins of  
203 interest (cytokines/metabolic hormones) and concentrations are calculated with Bio-Plex Manager  
204 4.1.1 based on a 5-parameter logistic plot regression formula. For cytokine quantification Bio-Plex  
205 Pro Human Cytokine Screening Panel 48-plex (BioRad, USA; 12007283), Bio-Plex Pro Human  
206 Cytokine ICAM-1 (BioRad, USA; 171B6009M) and Bio-Plex Pro Human Cytokine VCAM-1

207 (BioRad, USA; 171B6022M) were used. For the quantification of metabolic hormones Bio-Plex Pro  
208 Human Diabetes 10-plex Assay (BioRad, USA; 171A7001M) was used. Previous experimental  
209 insights showed the technical reproducibility of this protocol <sup>20</sup>.

210

### 211 **Human Langerhans islets in tumoral microenvironment**

212 Langerhans islets cells were placed in a 96-well plate (around 7500 cells/ per well) and cultured in  
213 a mixture of 150 µl volume of complete growth medium with serum (Celprogen, USA; M35002-  
214 04S) and 50 µl of supernatant of human PDA tissue explants. For reference purposes Langerhans  
215 islets cells were cultured in 200 µl of complete growth medium only. The supernatants were used  
216 to mimic a PDA tumor microenvironment and to investigate the behavior of intratumoral  
217 Langerhans islet cells. Supernatants of explants from five different PDA patients were used. The  
218 cells were treated for 48 hours. Afterwards, the total supernatants of the treated cells were  
219 collected and analyzed (Multiplex protein quantification of cytokines and metabolic hormones). For  
220 reference purposes the supernatant of undiluted human PDA tissue explants was also analyzed.  
221 The remaining cells were lysed (Bio-Plex Cell Lysis Kit, BioRad, USA; 171304011). In brief, the  
222 well-plate was placed on ice, the cells were rinsed with cell wash buffer and 120 µl of cell lysis  
223 buffer was added. The cells were incubated for 25 minutes on ice and during this time vortexed  
224 thoroughly every 5 minutes. After centrifugation (13.000 rpm for 30 minutes at 4°C), supernatant  
225 was collected and used for further analyses (signaling pathway analysis).

226

### 227 **Signaling pathway analysis**

228 Protein concentrations of lysate samples were determined (Pierce BCA Protein Assay, Thermo  
229 Fisher Scientific, Germany; 23227), the concentration then was adjusted from 20 to 130 µg/ml.  
230 Afterwards, multiple phosphorylated and total proteins were simultaneously quantified in each well  
231 of 96-well plates, using a protein array system according to the instructions of the manufacturer  
232 (BioRad, USA). A dual-laser microplate reader system detects the fluorescence of the individual  
233 dyed beads and the signal intensity on the bead surface. The relative abundance of each target  
234 protein is reported as the ratio of fluorescence among the wells. In the present study, Bio-Plex Pro  
235 Cell Signaling MAPK Panel 9-plex (BioRad, USA; LQ00000S6KL81S) and Bio-Plex Pro Cell  
236 Signaling Akt Panel 8-plex (BioRad, USA; LQ00006JK0K0RR) were used for phosphorylated  
237 protein quantification and Bio-Plex Pro Total Akt (BioRad, USA, 171V60001M), Bio-Plex Pro Total  
238 ERK1/2 (BioRad, USA, 171V60003M), Bio-Plex Pro Total GSK-3β (BioRad, USA, 171V60004M),  
239 Bio-Plex Pro Total JNK (BioRad, USA, 171V60007M), Bio-Plex Pro Total MEK1 (BioRad, USA,  
240 171V60008M), Bio-Plex Pro Total PTEN (BioRad, USA, 171V60016M), Bio-Plex Pro Total mTOR  
241 (BioRad, USA, 171V60015M), Bio-Plex Pro Total p38 MAPK (BioRad, USA, 171V60009M), Bio-  
242 Plex Pro Total p70 S6 Kinase (BioRad, USA, 171V60010M), Bio-Plex Pro Total Human GAPDH  
243 (BioRad, USA, 171V60019M), Bio-Plex Pro Total β-Actin (BioRad, USA, 171V60001M) were used  
244 for quantification of total proteins. The protein concentrations are calculated with Bio-Plex Manager  
245 4.1.1 based on a 5-parameter logistic plot regression formula.

246

## 247 **CCL27 quantification from stained tissue sections**

248 Samples were processed and stained automatically as described above. Whole-slide microscopic  
249 images were obtained and calibrated for proper comparability as described previously <sup>25</sup>.  
250 Corresponding cytokine concentrations were used for reference and after calibration, tissues of  
251 interest were quantified for CCL27 positivity and concentrations were calculated based on  
252 reference curves.

253

## 254 **Statistics**

255 Normality of the distributions was tested with Shapiro-Wilk test, and for normal distributed data the  
256 variance within each group of data was estimated and tested for equality between groups by a  
257 two-sided F-test. Cytokines which were undetectable in more than 10 percentage of samples were  
258 excluded. Correction for batch effects from three experiments was performed using the Python  
259 package *pycombat* (version 0.14) and validated by analyzing the mixture of samples within UMAP  
260 embeddings <sup>26</sup>. For comparison of two patient groups, two-sided Student's t test was used where  
261 stated, otherwise the non-parametric two-sided Wilcoxon-rank sum test was used. Based on the  
262 cytokine concentration data we reconstructed a T<sub>H</sub>1 cytokine-cytokine co-expression network. The  
263 edge weights of the network are based on the Pearson correlation coefficient between cytokine-  
264 cytokine ( $r \geq 0$ ,  $P < 0.05$ ). Association of CCL27 concentrations with number of chemotherapy  
265 cycles was done using Kendall rank correlation. Resulting p-values were adjusted for multiple  
266 hypothesis testing according to the Benjamini and Hochberg method <sup>27</sup>.

267 The overall survival time was defined using the latest information. For survival analysis, the  
268 patients were dichotomized based on cytokine concentration and cell density. The median  
269 cutpoints were determined to stratify patient into two groups (Hi and Lo). Kaplan Meier estimators  
270 of survival were used to visualize the survival curves. The log-rank test was used to compare  
271 overall survival between patients in different groups. P-values for the HiHi, HiLo, LoHi, and LoLo  
272 cytokine/cell combination analysis were corrected for multiple testing using the Benjamini-  
273 Hochberg method. All analyses were performed using the statistical software environment R  
274 (package *survival*). Stated percentages and quartiles include rounded numbers. Statistical  
275 analyses were carried out using R-4.0.2 and Python-3.6.4. Clustering and visualization were done  
276 with the software Genesis <sup>28</sup>.



## 277 RESULTS

### 278 Intratumoral CCL27 expression is associated with improved overall survival

279 To investigate the quantities of intratumoral immune cells and corresponding cytokine levels in  
280 PDA, we systematically performed stainings for CD3<sup>+</sup> T cells, CD8<sup>+</sup> T cells, CD4<sup>+</sup> T cells, FoxP3<sup>+</sup>  
281 T cells, CD20<sup>+</sup> B cells, NKp46<sup>+</sup> natural killer cells and CD163<sup>+</sup> tumor-associated macrophages and  
282 evaluated the expression profile of intratumoral cytokines in the resected tumor tissue of 51 PDA  
283 patients (**Table S1**) (**Figure S1A**). These parameters were analyzed in relation to the clinical  
284 outcome of patients.

285 In tumor tissue, the only cytokine significantly associated with prolonged survival was the  
286 expression of C-C motif chemokine ligand 27 (CCL27) (**Figure 1A and 1B**). Along with that, the  
287 tumor infiltration by CD8<sup>+</sup> cytotoxic T lymphocytes and the intratumoral CD8<sup>+</sup>/CD163<sup>+</sup>-ratio was  
288 significantly associated with improved survival (**Figure 1B**). Particularly, the combination of  
289 intratumoral CCL27 and CD8<sup>+</sup> T cells proved to be a strong marker for favorable prognosis (**Figure**  
290 **1B**) (**Table 1**). On the other hand, intratumoral expression of IFN- $\gamma$  was significantly associated  
291 with poorer survival in patients (**Figure 1A**). The other intratumoral cytokines and immune cells  
292 tested were not significantly associated with overall survival (**Figure 1A**). The association of clinical  
293 features (lymph node status, metastatic status, tumor grading) to overall survival confirmed  
294 previous reports (**Figure S1B**).

### 296 $\beta$ -cells within Langerhans islets are the source of CCL27 and its expression is correlated 297 with a T<sub>H</sub>1-type cytokine program

298 To elucidate whether the intratumoral expression of CCL27 relates to an immunity-driven anti-  
299 tumor signature within the tissue of PDA patients, we performed cytokine-cytokine correlation  
300 analyses. By that, we observed a characteristic T<sub>H</sub>1-type cytokine signature correlating to the  
301 intratumoral presence of CCL27 (**Figure 2A and 2B**).

302 Next, immunohistochemical and immunofluorescence stainings were performed on patient  
303 samples to identify the origin of CCL27 production. A staining for CCL27 revealed that islet-like  
304 structures within the tumor core are the main site of CCL27 expression (**Figure 2C**). This  
305 observation prompted us to perform an immunofluorescence staining for the Langerhans islet  
306 marker insulin and CCL27, which corroborated that CCL27 is mainly expressed by  $\beta$ -cells within  
307 Langerhans islets (**Figure 2D**).

### 309 CCR10 is expressed on CD4<sup>+</sup> FoxP3<sup>-</sup> T cells and selective inhibition of CCR10 abrogates 310 the T<sub>H</sub>1-type cytokine profile

311 Interaction of CCL27 with its only known receptor C-C chemokine receptor 10 (CCR10) is a key  
312 regulator for T-cell migration to the skin in inflammatory disorders<sup>29</sup>. And since our data revealed  
313 that tumor infiltration by cytotoxic T cells is independently prognostic favorable, we hypothesized  
314 that CCL27 might have similar immunomodulatory capacities in PDA. To identify CCR10-  
315 expressing cells in PDA, we performed systematic immunofluorescence stainings on patient

316 samples for CCR10<sup>+</sup> CD3<sup>+</sup> T cells, CCR10<sup>+</sup> CD4<sup>+</sup> T cells, CCR10<sup>+</sup> FoxP3<sup>+</sup> T cells and CCR10<sup>+</sup>  
317 CD8<sup>+</sup> T cells. A strong co-positivity for CCR10 was observed on CD3<sup>+</sup> and CD4<sup>+</sup> T cells (**Figure**  
318 **3A**). FoxP3<sup>+</sup> and CD8<sup>+</sup> T cells showed negligible expression of CCR10 (**Figure 3A**).

319 To assess whether blockade of CCR10 abolishes anti-tumor properties in the  
320 microenvironment of PDA, we investigated the effect of a selective small molecule inhibitor of  
321 CCR10 (BI-6901) in a patient-based organotypic tumor explant model<sup>20</sup> (**Table S2**) (**Figure 3B**).  
322 Inhibition of CCR10 led to an abrogation of the T<sub>H</sub>1-type cytokine program by downregulating the  
323 expression of IFN- $\gamma$ , IFN- $\alpha$ 2, TNF- $\alpha$  and TNF- $\beta$  (**Figure 3C**). Other T<sub>H</sub>1-supporting cytokines  
324 (TRAIL, IL-12p40, IL-12p70, IL-2, IL-7, IL-10) showed the same alteration (**Figure S3A**). At the  
325 cellular level no difference was observed in the quantity of CD163<sup>+</sup> or CD4<sup>+</sup> cells upon blockade  
326 of CCR10 (**Figure 3D**). However, the two tissues with the highest absolute number of CD4<sup>+</sup>  
327 lymphocytes showed the clearest reduction in tumor-infiltrating cytotoxic T cells after CCR10  
328 inhibition (**Figure 3D**).

329

### 330 **Intratumoral Langerhans islet cells secrete CCL27 via STAT3 regulation and** 331 **simultaneously downregulate insulin production**

332 We aimed to determine the metabolic implications for immunomodulatory CCL27-producing  
333 Langerhans islets, which are primarily attributed to the endocrine regulation of glycemic control.  
334 To evaluate clinically relevant metabolic features of Langerhans islets, we sought to compare the  
335 preoperative glycemic status (type 2 diabetes mellitus (T2DM) or no T2DM) of PDA patients based  
336 on their intratumoral CCL27 expression. This analysis unraveled that CCL27 expression is  
337 significantly associated with the onset of T2DM in tumor patients (**Figure 4A**). Furthermore, the  
338 marker combination of CCL27 and preoperative diagnosis of diabetes was shown to serve as a  
339 potential parameter for favorable prognosis. However, T2DM is a complex disease with multiple  
340 negative implications for human health and further investigation is needed to better understand  
341 the role of different types of diabetes and the timepoint of disease onset (long-standing vs. new-  
342 onset T2DM) in the context of PDA (**Figure 4B**) (**Table 2**).

343 To more fully characterize the multifaceted role of Langerhans islets in PDA, we explored  
344 their secretion and signaling profile after exerting tumoral stress on them (**Figure 4C**). The tumor  
345 microenvironment for this analysis was mimicked by using the supernatant of PDA explants from  
346 five different patients. We observed that tumoral stress led to an increased secretion of CCL27  
347 matching our previous findings (**Figure 4D**). Simultaneously, the secretion of insulin and glucagon  
348 was downregulated (**Figure 4D**). While on the other hand, the secretion of the incretin glucose-  
349 dependent insulintropic polypeptide (GIP) as well as the production of the hormone resistin was  
350 increased in Langerhans islet cells (**Figure 4D**). The same tendency (upregulation in 3 of 5 cases)  
351 was seen for glucagon-like peptide 1 (GLP-1) (**Figure S4A**). However, evaluation of dynamic  
352 changes in hormone concentrations is necessary to comprehensively understand these regulatory  
353 mechanisms.

354 Molecular analyses based on protein phosphorylation patterns in these Langerhans islets  
355 cells showed an activation of signal transducer and activator of transcription 3 (STAT3) and BCL2-  
356 associated agonist of cell death (BAD) upstream regulated by phosphatase and tensin homologue  
357 (PTEN) and AKT (also known as protein kinase B or PKB). Simultaneously, the extracellular signal-  
358 regulated kinases 1 and 2 (ERK1/2) were dephosphorylated and thereby inactivated (**Figure 4E**  
359 **and S4B**). Further, we corroborated the phosphorylation of STAT3 in intratumoral Langerhans  
360 islets via immunofluorescence staining by comparing human PDA tissue and healthy pancreas  
361 tissue (**Figure 4F**).

362

### 363 **T2DM and dynamic of HbA1c levels are markers for response to neoadjuvant chemotherapy**

364 To explore the relationship of tumoral CCL27 expression and treatment response to adjuvant  
365 chemotherapy (= number of adjuvant chemotherapy cycles), we performed a comparison analysis  
366 between tissues of patients with high tumoral CCL27 expression (CCL27<sup>hi</sup>) and low tumoral CCL27  
367 expression (CCL27<sup>lo</sup>). We discovered that CCL27 expression, also in a linear relationship, was  
368 significantly associated with the number of chemotherapy cycles (**Figure 5A**).

369 Since CCL27 secretion is linked to glycemic control, we hypothesized that diagnosis of  
370 T2DM or glycated haemoglobin (HbA1c) levels may have the potential to identify patients who are  
371 most likely to respond to chemotherapy. To investigate this, we screened a cohort of 2264 PDA  
372 patients who were planned for pancreatoduodenectomy (**Figure B**). We identified 122 patients  
373 who had undergone neoadjuvant chemotherapy with FOLFIRINOX prior to the planned surgery  
374 and with extractable data on HbA1c levels before and after FOLFIRINOX (**Table 3**). The  
375 retrospective analysis unveiled that diagnosis of T2DM was significantly associated with response  
376 to neoadjuvant chemotherapy with FOLFIRINOX (**Figure 5B**). Moreover, decline of glycemic  
377 control (= increase of HbA1c levels) during neoadjuvant chemotherapy with FOLFIRINOX was  
378 also significantly associated with treatment response. This observation was statistically significant  
379 in PDA patients with and without T2DM (**Figure S5A**). In contrast, improved glycemic control (=   
380 decrease of HbA1c levels) was significantly associated with unresponsiveness to neoadjuvant  
381 FOLFIRINOX (**Figure 5 B**). This was significant in patients without T2DM and the same trend was  
382 seen for patients with T2DM (**Figure S5A**).

383 To confirm our concept that deterioration of glycemic control is accompanied by increased  
384 local CCL27 levels, we analyzed the tumor tissue of a patient who responded to neoadjuvant  
385 chemotherapy with FOLFIRINOX and had a rising HbA1c level (**Figure 5C**). This case validated  
386 our findings and demonstrated that not only did the HbA1c level increase, but also the local CCL27  
387 concentration (**Figure 5 C and S5B**).

## 388 **DISCUSSION**

389 Induction of anti-tumor immunity by increasing the number of tumor-infiltrating T cells is an  
390 unresolved challenge and limited T cell infiltration is a major reason for resistance to  
391 immunotherapy in PDA. In the present report, we demonstrate a crucial role of endocrine  
392 Langerhans islets in shaping anti-tumor immunity by undergoing a phenotype shift from glycemic  
393 control to CCL27 production. Subsequently, CCL27 promotes a T<sub>H</sub>1-type cytokine program in the  
394 microenvironment, enhances tumoral T cell infiltration and improves survival of patients. To date,  
395 CCL27 has primarily been described as a chemotactic mediator of T cell-dependent (skin)  
396 inflammation and previous reports showed concordantly that CCL27 induces T cell attraction and  
397 inflammation via CCR10<sup>+</sup> CD4<sup>+</sup> T lymphocytes whereas CD8<sup>+</sup> T lymphocytes show negligible  
398 levels of CCR10 on their cell surface<sup>29,30</sup>. Our data corroborated these findings in the context of  
399 PDA and demonstrated that the anti-tumor effect can be abrogated by inhibition of CCR10. In other  
400 malignancies CCL27-CCR10 interaction has been suspected to promote lymph node metastases<sup>31</sup>  
401 and contribute to inflammation-driven hepatocarcinogenesis<sup>32</sup>. However, our results highlight that  
402 CCL27-CCR10 interaction plays an opposite role in the microenvironment of PDA by potentially  
403 turning it into an immunologically “hot” tumor with beneficial clinical outcomes. Also, our data  
404 indicate that efficacy of effector T cell-attraction by CCL27 is dependent on the quantity of CCR10<sup>+</sup>  
405 CD4<sup>+</sup> T cells, in order to generate a sufficient T<sub>H</sub>1-cytokine signal. This is line with existing  
406 evidence, which showed that CD4<sup>+</sup> T cells play a fundamental role in driving anti-tumor CD8<sup>+</sup> T  
407 cell responses and that their presence is associated with the number of CD8<sup>+</sup> T cells in solid  
408 tumors<sup>33,34</sup>. The use of a fully human patient-derived model in our experiments allowed us to link  
409 the clinical observations to functional molecular findings.

410 Another interesting aspect of our results is that endocrine Langerhans islet cells were  
411 identified as the primary source of CCL27 suggesting a critical involvement of the endocrine-  
412 exocrine axis in anti-tumor immunity. Primarily, Langerhans islets are attributed to the endocrine  
413 regulation of glycemic control, which requires a precisely fine-tuned balance of multiple  
414 glucoregulatory hormones. Glucose homeostasis is primarily regulated by a tug-of-war between  
415 endocrine Langerhans islet hormones. Glucagon is secreted by  $\alpha$ -cells and increases plasma  
416 glucose levels, whereas insulin from  $\beta$ -cells decreases them. Furthermore, a variety of other  
417 hormones are critically involved, such as the incretins GIP and GLP-1, which are secreted by  $\alpha$ -  
418 cells and regulate blood glucose levels through potentiation of insulin secretion and inhibition of  
419 glucagon secretion<sup>35-39</sup>. In light of the existing evidence, our findings suggest that while  
420 intratumoral  $\beta$ -cells secrete CCL27 which inhibits tumor progression, their metabolic function  
421 declines resulting in an insulin deficiency. This eventually leads to a compensatory upregulation  
422 of intransular GIP and GLP-1 secretion, which fail to properly potentiate insulin expression but  
423 inhibit glucagon secretion. This mechanism of endocrine-exocrine interaction also explains our  
424 clinical observation that onset of T2DM in PDA patients is significantly associated with CCL27  
425 expression of tumors. In addition, the observed lower insulin levels might further help to limit

426 aberrant activation of oncogenic signaling pathways and may contribute to systemic antineoplastic  
427 functions<sup>40-42</sup>. Another factor potentially contributing to the loss of glycemic control in patients is  
428 the upregulated resistin secretion. Resistin is secreted by adipocytes and Langerhans islets,  
429 known as a key link between obesity and diabetes and leads to peripheral insulin resistance<sup>43</sup>.

430 Further, the identification of STAT3 as activator of CCL27 production is in line with previous  
431 findings, which presented its common involvement in cytokine release by Langerhans islet cells<sup>44</sup>.  
432 Interestingly, STAT3 also plays a critical role in inhibiting insulin secretion in mice<sup>45,46</sup>, which  
433 corroborates our findings. And the observed phosphorylation and activation of anti-apoptotic BAD  
434 might contribute to preservation of this CCL27-releasing and insulin-inhibiting phenotype of  
435 Langerhans islets.

436 The interplay of T2DM to PDA is complex and, despite numerous studies, not  
437 comprehensively understood. However, strong existing evidence demonstrated that (new-onset)  
438 T2DM is likely to be a consequence of a tumor microenvironment consisting of progressively  
439 growing PDA cells<sup>47</sup>. We complement prior findings by showing that onset of T2DM is a potential  
440 sign of functionally shifting Langerhans islets towards shaping anti-tumor immunity via CCL27  
441 production as a defense mechanism against PDA. This observation also underscores the complex  
442 and bilateral role of local immunity in PDA: While IL-1 $\beta$ -induced pancreatitis promotes PDA via  
443 immunosuppression<sup>48</sup>, development of T2DM promotes autoimmune anti-tumor responses via  
444 CCL27. Further, the interconnection of glycemic control and PDA prompted us to investigate  
445 metabolic parameters as markers for response to neoadjuvant chemotherapy with FOLFIRINOX.  
446 Historically, the combination therapies FOLFIRINOX and gemcitabine with nab-paclitaxel  
447 significantly increased survival of patients<sup>49,50</sup>. While FOLFIRINOX is more effective than  
448 gemcitabine, the regimen also causes more side effects and significantly reduces quality of life of  
449 patients. However, response to chemotherapy varies, with only one third of patients responding to  
450 a specific regimen<sup>51</sup>. Given the fact that patients with unresponsiveness to neoadjuvant  
451 chemotherapy and irresectable PDA have a median life expectancy of less than a year preventing  
452 FOLFIRINOX-induced toxicity is an urgent clinical need. FOLFIRINOX is known to induce an anti-  
453 tumor immune infiltrate in the pancreatic tumor microenvironment, which is characterized by  
454 increased cell densities of CD8<sup>+</sup> and CD4<sup>+</sup> T lymphocytes as well as decreased numbers of FoxP3<sup>+</sup>  
455 and CD163<sup>+</sup> cells<sup>52-54</sup>. We hypothesize that this local immune reaction is the reason for our  
456 observation of elevated HbA1c levels and increased CCL27 secretion after exposure to  
457 FOLFIRINOX, similarly to the production of inflammatory signals as an Langerhans islet response  
458 to various local inflammatory factors during development of diabetes<sup>14,55,56</sup>. Our findings highlight  
459 that the presence of T2DM before the start of neoadjuvant chemotherapy as well as the dynamic  
460 of HbA1c levels during the treatment are markers for response to FOLFIRINOX. In line with this,  
461 another independent clinical investigation demonstrated that elevated HbA1c levels can be utilized  
462 as a marker for stratifying patients most likely to respond to FOLFIRINOX<sup>51</sup>.

463 In conclusion, our findings describe a novel mechanism of anti-tumor action in PDA  
464 unravelling an unexpected role for endocrine Langerhans islets with implications for the clinical

465 management of PDA. Repurposing metabolic parameters has the potential to serve as a tool for  
466 clinical decision-making. However, prospective clinical trials are needed to further investigate  
467 these applications. Also, CCL27-CCR10 interaction could serve as a stratification parameter for  
468 immunotherapeutic strategies.

469 **ACKNOWLEDGEMENTS**

470 We thank Jana Wolf, Ulrike Prüfer and Rosa Eurich for excellent technical assistance. Schematic  
471 figures were created with BioRender.com. PDA samples were provided by the Pancobank platform  
472 at the European Pancreas Center Heidelberg (EPZ), member of the Biomaterial Bank Heidelberg  
473 (BMBH).

474

475 **CONTRIBUTORS**

476 Conceptualization, A.A. and N.H.; Methodology, A.A., S.K., M.S. and N.H.; Formal Analysis, A.A.,  
477 P.C., D.F. and N.H.; Investigation, A.A., S.K. and R.K.; Resources, R.K., T.H., N.G., M.H., C.S.,  
478 C.F., I.Z., D.J. and N.H.; Data Curation, A.A., P.C. and N.H.; Writing - Original Draft, A.A.; Writing  
479 - Review & Editing, A.A, R.K., S.K., M.S, N.V., D.F., M.H., N.G., C.S., C.F., M.S., T.S., Y.T., L.Z.,  
480 I.Z., D.J. and N.H.; Visualization, A.A., P.C., N.V. and N.H.; Supervision, I.Z., D.J. and N.H.; Project  
481 Administration, A.A. and N.H.; Funding Acquisition, I.Z., D.J. and N.H.

482

483 **FUNDING**

484 This study was supported by the RR Pohl Stiftung.

485

486 **COMPETING INTERESTS**

487 None declared.

488

489 **ETHICS APPROVAL**

490 Ethics Committee of the University of Heidelberg.

491

492 **DATA AVAILABILITY STATEMENT**

493 All data are available upon request. All data relevant to the study are included in the article or  
494 uploaded as supplementary information.

## REFERENCES

1. Bray, F., *et al.* Global cancer statistics 2018: GLOBOCAN estimates of incidence and mortality worldwide for 36 cancers in 185 countries. *CA: a cancer journal for clinicians* **68**, 394-424 (2018).
2. Hanahan, D. & Weinberg, R.A. Hallmarks of cancer: the next generation. *cell* **144**, 646-674 (2011).
3. Sharma, P. & Allison, J.P. The future of immune checkpoint therapy. *Science* **348**, 56-61 (2015).
4. Clark, C.E., *et al.* Dynamics of the immune reaction to pancreatic cancer from inception to invasion. *Cancer research* **67**, 9518-9527 (2007).
5. Balachandran, V.P., *et al.* Identification of unique neoantigen qualities in long-term survivors of pancreatic cancer. *Nature* **551**, 512-516 (2017).
6. Bailey, P., *et al.* Genomic analyses identify molecular subtypes of pancreatic cancer. *Nature* **531**, 47-52 (2016).
7. Vonderheide, R.H. The immune revolution: a case for priming, not checkpoint. *Cancer cell* **33**, 563-569 (2018).
8. Wang, Z., Zhao, J. & Zhao, H. Infiltrating CD4/CD8 high T cells shows good prognostic impact in pancreatic cancer. *International Journal of Clinical and Experimental Pathology* **10**, 8820 (2017).
9. Buck, M.D., Sowell, R.T., Kaech, S.M. & Pearce, E.L. Metabolic instruction of immunity. *Cell* **169**, 570-586 (2017).
10. Foley, K., Kim, V., Jaffee, E. & Zheng, L. Current progress in immunotherapy for pancreatic cancer. *Cancer letters* **381**, 244-251 (2016).
11. Ho, W.J., Jaffee, E.M. & Zheng, L. The tumor microenvironment in pancreatic cancer—clinical challenges and opportunities. *Nature Reviews Clinical Oncology*, 1-14 (2020).
12. Weisberg, S.P., *et al.* CCR2 modulates inflammatory and metabolic effects of high-fat feeding. *The Journal of clinical investigation* **116**, 115-124 (2006).
13. Ying, W., *et al.* Expansion of islet-resident macrophages leads to inflammation affecting  $\beta$  cell proliferation and function in obesity. *Cell metabolism* **29**, 457-474. e455 (2019).
14. Frigerio, S., *et al.*  $\beta$  cells are responsible for CXCR3-mediated T-cell infiltration in insulinitis. *Nature medicine* **8**, 1414-1420 (2002).
15. Hennig, R., Ding, X. & Adrian, T.E. On the role of the islets of Langerhans in pancreatic cancer. *Histology and histopathology* (2004).
16. De Souza, A., Irfan, K., Masud, F. & Saif, M.W. Diabetes type 2 and pancreatic cancer: a history unfolding. *JOP: Journal of the pancreas* **17**, 144 (2016).
17. Busaidy, N., *et al.* Survival of resectable pancreatic cancer patients with diabetes. *Journal of Clinical Oncology* **24**, 4098-4098 (2006).
18. Kang, S.P. & Saif, M.W. Clinical outcome of pancreatic cancer patients with diabetes mellitus: is diabetes a poor prognostic factor? *JOP. Journal of the Pancreas* **11**, 334-335 (2010).
19. Gullo, L., Pezzilli, R., Morselli-Labate, A.M. & Group, I.P.C.S. Diabetes and the risk of pancreatic cancer. *New England Journal of Medicine* **331**, 81-84 (1994).
20. Halama, N., *et al.* Tumoral immune cell exploitation in colorectal cancer metastases can be targeted effectively by anti-CCR5 therapy in cancer patients. *Cancer cell* **29**, 587-601 (2016).
21. Halama, N., *et al.* Estimation of immune cell densities in immune cell conglomerates: an approach for high-throughput quantification. **4**, e7847 (2009).
22. Halama, N., *et al.* Quantification of prognostic immune cell markers in colorectal cancer using whole slide imaging tumor maps. **32**, 333-340 (2010).
23. Halama, N., *et al.* Natural killer cells are scarce in colorectal carcinoma tissue despite high levels of chemokines and cytokines. **17**, 678-689 (2011).



24. Emmert-Buck, M.R., *et al.* Laser capture microdissection. **274**, 998-1001 (1996).
25. Inman, C., *et al.* Validation of computer-assisted, pixel-based analysis of multiple-colour immunofluorescence histology. *Journal of immunological methods* **302**, 156-167 (2005).
26. McInnes, L., Healy, J. & Melville, J. Umap: Uniform manifold approximation and projection for dimension reduction. *arXiv preprint arXiv:1802.03426* (2018).
27. Benjamini, Y. & Hochberg, Y. Controlling the false discovery rate: a practical and powerful approach to multiple testing. *Journal of the Royal statistical society: series B (Methodological)* **57**, 289-300 (1995).
28. Sturn, A., Quackenbush, J. & Trajanoski, Z. Genesis: cluster analysis of microarray data. *Bioinformatics* **18**, 207-208 (2002).
29. Homey, B., *et al.* CCL27–CCR10 interactions regulate T cell-mediated skin inflammation. *Nature medicine* **8**, 157-165 (2002).
30. Wang, X., *et al.* Visualizing CD4 T-cell migration into inflamed skin and its inhibition by CCR4/CCR10 blockades using in vivo imaging model. *British Journal of Dermatology* **162**, 487-496 (2010).
31. Karnezis, T., *et al.* CCL27/CCL28–CCR10 Chemokine Signaling Mediates Migration of Lymphatic Endothelial Cells. *Cancer Research* **79**, 1558-1572 (2019).
32. Wu, Q., *et al.* The chemokine receptor CCR10 promotes inflammation-driven hepatocarcinogenesis via PI3K/Akt pathway activation. *Cell Death & Disease* **9**, 1-18 (2018).
33. Tay, R.E., Richardson, E.K. & Toh, H.C. Revisiting the role of CD4+ T cells in cancer immunotherapy—new insights into old paradigms. *Cancer Gene Therapy*, 1-13 (2020).
34. Zander, R., *et al.* CD4+ T cell help is required for the formation of a cytolytic CD8+ T cell subset that protects against chronic infection and cancer. *Immunity* **51**, 1028-1042. e1024 (2019).
35. Dupre, J., Ross, S., Watson, D. & Brown, J. Stimulation of insulin secretion by gastric inhibitory polypeptide in man. *The Journal of Clinical Endocrinology & Metabolism* **37**, 826-828 (1973).
36. Kreymann, B., Ghatei, M., Williams, G. & Bloom, S. Glucagon-like peptide-1 7-36: a physiological incretin in man. *The Lancet* **330**, 1300-1304 (1987).
37. Mojsov, S., Weir, G. & Habener, J. Insulintropin: glucagon-like peptide I (7-37) co-encoded in the glucagon gene is a potent stimulator of insulin release in the perfused rat pancreas. *The Journal of clinical investigation* **79**, 616-619 (1987).
38. Fujita, Y., *et al.* Glucose-dependent insulinotropic polypeptide is expressed in pancreatic islet  $\alpha$ -cells and promotes insulin secretion. *Gastroenterology* **138**, 1966-1975. e1961 (2010).
39. Komatsu, R., *et al.* Glucagonostatic and insulinotropic action of glucagonlike peptide I-(7-36)-amide. *Diabetes* **38**, 902-905 (1989).
40. Tajan, M. & Vousden, K.H. Dietary Approaches to Cancer Therapy. *Cancer Cell* (2020).
41. Halbrook, C.J. & Lyssiotis, C.A. Employing metabolism to improve the diagnosis and treatment of pancreatic cancer. *Cancer cell* **31**, 5-19 (2017).
42. Trajkovic-Arsic, M., Kalideris, E. & Siveke, J.T. The role of insulin and IGF system in pancreatic cancer. *J Mol Endocrinol* **50**, R67-R74 (2013).
43. Stepan, C.M., *et al.* The hormone resistin links obesity to diabetes. *Nature* **409**, 307-312 (2001).
44. Cheng, Y., *et al.* Hypoxia/reoxygenation-induced HMGB1 translocation and release promotes islet proinflammatory cytokine production and early islet graft failure through TLRs signaling. *Biochimica et Biophysica Acta (BBA)-Molecular Basis of Disease* **1863**, 354-364 (2017).
45. Velayos, T., *et al.* An activating mutation in STAT3 results in neonatal diabetes through reduced insulin synthesis. *Diabetes* **66**, 1022-1029 (2017).

46. Chen, J., *et al.* LIM-homeodomain transcription factor Isl-1 mediates the effect of leptin on insulin secretion in mice. *Journal of Biological Chemistry* **288**, 12395-12405 (2013).
47. Molina-Montes, E., *et al.* Deciphering the complex interplay between pancreatic cancer, diabetes mellitus subtypes and obesity/BMI through causal inference and mediation analyses. *Gut* **70**, 319-329 (2021).
48. Takahashi, R., *et al.* Interleukin-1 $\beta$ -induced pancreatitis promotes pancreatic ductal adenocarcinoma via B lymphocyte-mediated immune suppression. *Gut* **70**, 330-341 (2021).
49. Conroy, T., *et al.* FOLFIRINOX versus gemcitabine for metastatic pancreatic cancer. *New England Journal of Medicine* **364**, 1817-1825 (2011).
50. Von Hoff, D.D., *et al.* Increased survival in pancreatic cancer with nab-paclitaxel plus gemcitabine. *New England Journal of Medicine* **369**, 1691-1703 (2013).
51. Capello, M., *et al.* CES2 Expression in Pancreatic Adenocarcinoma Is Predictive of Response to Irinotecan and Is Associated With Type 2 Diabetes. *JCO Precision Oncology* **4**, 426-436 (2020).
52. Cai, L., *et al.* Enhancement of anti-tumor immunity and survival prolongation by neoadjuvant 5-FU, oxaliplatin and irinotecan (folfirinox) in pancreatic ductal adenocarcinoma patients. *HPB* **20**, S10 (2018).
53. Peng, H., *et al.* Response to FOLFIRINOX neoadjuvant chemotherapy is associated with a high prevalence of Tbet expressing T cells in pancreatic cancer patients. (Am Assoc Immunol, 2020).
54. Michelakos, T., *et al.* Tumor microenvironment immune response in pancreatic ductal adenocarcinoma patients treated with neoadjuvant therapy. *JNCI: Journal of the National Cancer Institute* (2020).
55. Arnush, M., *et al.* IL-1 produced and released endogenously within human islets inhibits beta cell function. *The Journal of clinical investigation* **102**, 516-526 (1998).
56. Donath, M.Y., *et al.* Islet inflammation in type 2 diabetes: from metabolic stress to therapy. *Diabetes care* **31**, S161-S164 (2008).

## TABLES

Table 1. Subject characteristics

|                                                           |                                           | CCL27 <sup>hi</sup> | CCL27 <sup>lo</sup> | CCL27 <sup>hi</sup> | CCL27 <sup>lo</sup> | P-value |
|-----------------------------------------------------------|-------------------------------------------|---------------------|---------------------|---------------------|---------------------|---------|
|                                                           |                                           | CD8 <sup>hi</sup>   | CD8 <sup>hi</sup>   | CD8 <sup>lo</sup>   | CD8 <sup>lo</sup>   |         |
| Total number of patients (n)                              |                                           | 16                  | 9                   | 9                   | 16                  |         |
| Female / Male (n / n)                                     |                                           | 11 / 5              | 3 / 6               | 5 / 4               | 5 / 11              | 0.143   |
| Age                                                       | Mean (years)                              | 67.8±0.6            | 68.6±1.3            | 63.8±0.9            | 61.8±0.7            |         |
|                                                           | > / ≤ Average age <sup>a</sup><br>(n / n) | 11 / 5              | 5 / 4               | 4 / 5               | 8 / 8               | 0.634   |
| BMI <sup>b</sup>                                          | Mean (kg/m <sup>2</sup> )                 | 25.5±0.2            | 23.3±0.4            | 22.9±0.4            | 24.7±0.2            |         |
|                                                           | > / ≤ Average BMI <sup>c</sup><br>(n / n) | 9 / 4               | 2 / 3               | 2 / 6               | 5 / 8               | 0.236   |
| T                                                         | T3 (n)                                    | 16                  | 9                   | 9                   | 15                  | 1.000   |
|                                                           | T4 (n)                                    | 0                   | 0                   | 0                   | 1                   |         |
| N                                                         | N0 (n)                                    | 3                   | 2                   | 2                   | 1                   | 0.689   |
|                                                           | N1 (n)                                    | 13                  | 7                   | 7                   | 15                  |         |
| M                                                         | M0 (n)                                    | 15                  | 9                   | 8                   | 15                  | 1.000   |
|                                                           | M1 (n)                                    | 1                   | 0                   | 1                   | 1                   |         |
| Grade                                                     | G2 (n)                                    | 10                  | 8                   | 3                   | 10                  | 0.184   |
|                                                           | G3 (n)                                    | 6                   | 1                   | 5                   | 6                   |         |
| R <sup>d</sup>                                            | R0 (n)                                    | 4                   | 1                   | 0                   | 1                   | 0.339   |
|                                                           | R1 (n)                                    | 12                  | 8                   | 9                   | 15                  |         |
| Gemcitabine-based chemotherapy (n) <sup>e</sup>           |                                           | 15                  | 5                   | 6                   | 9                   |         |
| Diabetes prior to surgery (yes (n) / no (n)) <sup>f</sup> |                                           | 8 / 1               | 3 / 4               | 2 / 4               | 3 / 10              | 0.018   |
| Overall survival (days)                                   |                                           | 919±41              | 596±39              | 606±43              | 319±13              |         |

Data are shown as mean ± SEM.

Fisher's exact test was used to compare patients of the different groups.

T= stage of primary tumor, N= regional lymph node status, M= distant metastasis status, R= resection margin status, BMI= Body-Mass-Index.

<sup>a</sup> Average age in all patients is 65.3 years.

<sup>b</sup> Information available on BMI from 39 patients.

<sup>c</sup> Average BMI in all patients is 24.43 kg/m<sup>2</sup>.

<sup>d</sup> Information available on resection margin status from 50 patients.

<sup>e</sup> Standard treatment in the study period was upfront resection and gemcitabine-based adjuvant chemotherapy. Information available on confirmed application of gemcitabine from 35 patients.

<sup>f</sup> Information available on glycemic status (according to HbA1c levels or medical history) from 35 patients.

Table 2. Subject characteristics

|                                                    |                                             | CCL27 <sup>hi</sup><br>Diabetes | CCL27 <sup>hi</sup><br>No diabetes | CCL27 <sup>lo</sup><br>Diabetes | CCL27 <sup>lo</sup><br>No diabetes | P-value  |
|----------------------------------------------------|---------------------------------------------|---------------------------------|------------------------------------|---------------------------------|------------------------------------|----------|
| Total number of patients (n)                       |                                             | 10                              | 5                                  | 6                               | 14                                 |          |
| Female / Male (n / n)                              |                                             | 8 / 2                           | 3 / 2                              | 1 / 5                           | 4 / 10                             | 0.033    |
| Age                                                | Mean (years)                                | 68.9±0.9                        | 62.2±1.7                           | 65.7±1.7                        | 61.8±0.9                           |          |
|                                                    | > / ≤ Average age <sup>a</sup><br>(n / n)   | 8 / 2                           | 2 / 3                              | 3 / 3                           | 7 / 7                              | 0.353    |
| BMI <sup>b</sup>                                   | Mean (kg/m <sup>2</sup> )                   | 25.7±0.5                        | 21.8±0.7                           | 23.1±0.5                        | 24.7±0.2                           |          |
|                                                    | > / ≤ Average BMI <sup>c</sup><br>(n / n)   | 6 / 2                           | 1 / 4                              | 1 / 4                           | 6 / 4                              | 0.153    |
| T                                                  | T3 (n)                                      | 10                              | 5                                  | 6                               | 13                                 | 1.000    |
|                                                    | T4 (n)                                      | 0                               | 0                                  | 0                               | 1                                  |          |
| N                                                  | N0 (n)                                      | 3                               | 0                                  | 0                               | 2                                  | 0.503    |
|                                                    | N1 (n)                                      | 7                               | 5                                  | 6                               | 12                                 |          |
| M                                                  | M0 (n)                                      | 10                              | 5                                  | 6                               | 13                                 | 1.000    |
|                                                    | M1 (n)                                      | 0                               | 0                                  | 0                               | 1                                  |          |
| Grade                                              | G2 (n)                                      | 6                               | 2                                  | 5                               | 9                                  | 0.592    |
|                                                    | G3 (n)                                      | 4                               | 3                                  | 1                               | 5                                  |          |
| R <sup>d</sup>                                     | R0 (n)                                      | 2                               | 0                                  | 0                               | 2                                  | 0.731    |
|                                                    | R1 (n)                                      | 8                               | 5                                  | 6                               | 11                                 |          |
| HbA1c<br>level <sup>e</sup>                        | Mean (%)                                    | 7.0±0.08                        | 5.8±0.06                           | 7.5±0.20                        | 5.4±0.04                           |          |
|                                                    | > / ≤ Average<br>HbA1c <sup>f</sup> (n / n) | 9 / 1                           | 1 / 4                              | 6 / 0                           | 0 / 13                             | < 0.0001 |
| Gemcitabine-based<br>chemotherapy (n) <sup>g</sup> |                                             | 10                              | 4                                  | 3                               | 10                                 |          |
| Overall survival (days)                            |                                             | 849±52                          | 843±106                            | 450±60                          | 370±17                             |          |

Data are shown as mean ± SEM.

Fisher's exact test was used to compare patients of the different groups.

T= stage of primary tumor, N= regional lymph node status, M= distant metastasis status, R= resection margin status, BMI= Body-Mass-Index.

<sup>a</sup> Average age in all patients is 64.5 years.

<sup>b</sup> Information available on BMI from 28 patients.

<sup>c</sup> Average BMI in all patients is 24.18 kg/m<sup>2</sup>.

<sup>d</sup> Information available on resection margin status from 34 patients.

<sup>e</sup> Information available on HbA1c level from 34 patients.

<sup>f</sup> Average HbA1c level in all patients is 6.3 %.

<sup>g</sup> Standard treatment in the study period was upfront resection and gemcitabine-based adjuvant chemotherapy. Information available on confirmed application of gemcitabine from 27 patients.

Table 3. Subject characteristics

|                              |        | Response to FOLFIRINOX |          | No response to FOLFIRINOX        |          |
|------------------------------|--------|------------------------|----------|----------------------------------|----------|
|                              |        | T2DM                   | No T2DM  | T2DM                             | No T2DM  |
| Total number of patients (n) |        | 38                     | 37       | 11                               | 36       |
| Female / Male (n / n)        |        | 20 / 18                | 20 / 17  | 3 / 8                            | 10 / 26  |
| Age (years)                  |        | 62.1±1.3               | 58.8±1.6 | 65.9±2.0                         | 59.6±2.1 |
| T                            | T1 (n) | 8                      | 12       | Irresectable (no histopathology) |          |
|                              | T2 (n) | 13                     | 16       |                                  |          |
|                              | T3 (n) | 14                     | 7        |                                  |          |
|                              | T4 (n) | 3                      | 2        |                                  |          |
| N                            | N0 (n) | 16                     | 20       |                                  |          |
|                              | N1 (n) | 15                     | 9        |                                  |          |
|                              | N2 (n) | 7                      | 8        |                                  |          |
| M                            | M0 (n) | 34                     | 33       |                                  |          |
|                              | M1 (n) | 4                      | 4        |                                  |          |
| R                            | R0 (n) | 29                     | 27       |                                  |          |
|                              | R1 (n) | 9                      | 10       |                                  |          |

Data are shown as mean ± SEM.

T= stage of primary tumor, N= regional lymph node status, M= distant metastasis status, R= resection margin status.

FOLFIRINOX= fluorouracil, leucovorin, irinotecan and oxaliplatin

T2DM= type 2 diabetes mellitus

Figure 1

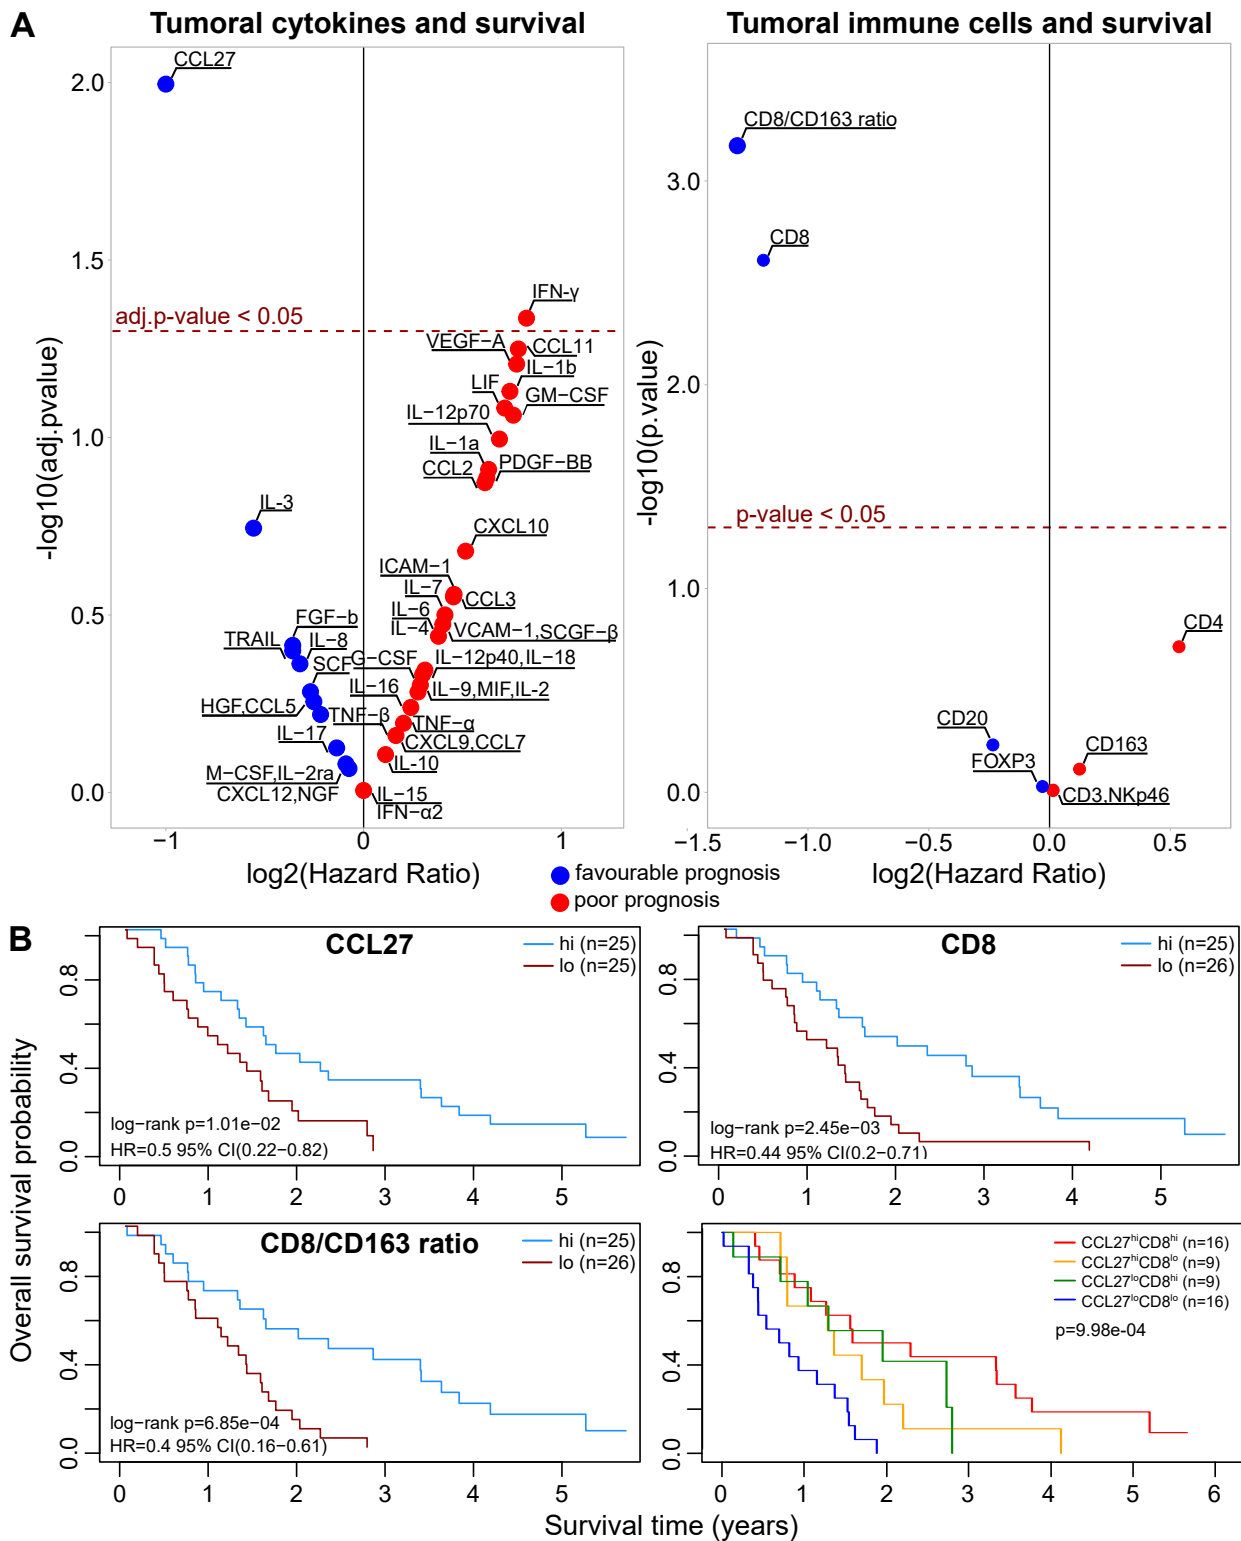

**Figure 1** Intratumoral CCL27 expression is associated with improved overall survival  
**(A)** Volcano plot of statistical significance (y-axis) against  $\log_2(\text{Hazard Ratio})$  (x-axis) for cytokines (left) and immune cells (right) showing favorable and poor prognostic markers.  
**(B)** Kaplan-Meier survival plots of patients with high (hi) versus low (lo) concentration of CCL27 (n=25/n=25), hi versus lo density of CD8+ T cells (n=25/n=26), hi versus lo CD8+/CD168+ ratio (n=25/n=26) and the combination of CCL27 (hi or lo) and CD8+ T cells (hi or lo). The median cutpoints were determined to stratify patients into hi and lo. Survival data were analyzed using the log-rank test. See also Figure S1.

Figure 2

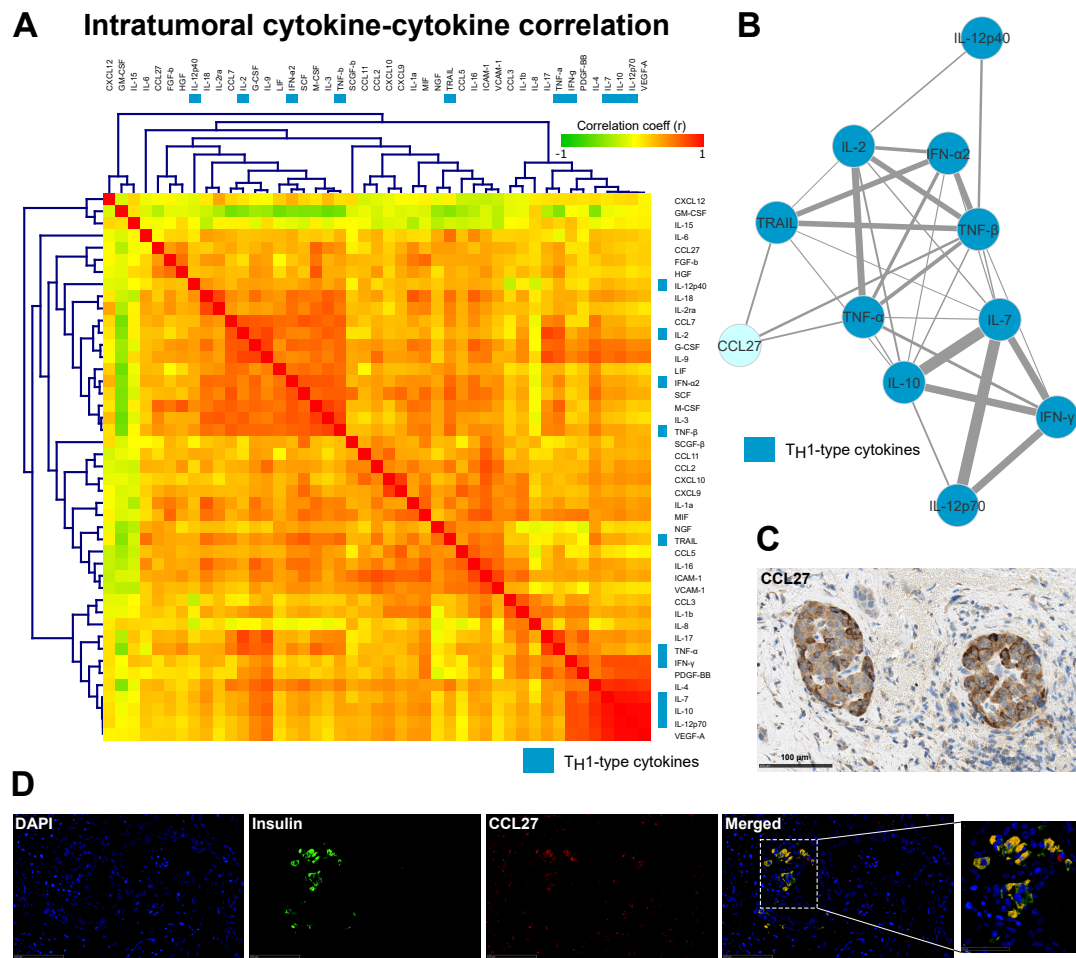

**Figure 2**  $\beta$ -cells within Langerhans islets are the source of CCL27 and its expression is correlated with a TH1-type cytokine program  
**(A)** Heatmap showing the intratumoral cytokine-cytokine correlation from human PDA tissue samples (n=48). TH1-type cytokines are indicated in blue.  
**(B)** Network plot of intratumoral cytokine-cytokine correlations of TH1-type cytokines in human PDA tissue samples (n=48). The edge weights of the network are based on the Pearson correlation coefficient between cytokine-cytokine ( $r \geq 0$ ,  $p < 0.05$ ).  
**(C)** Immunohistochemistry for CCL27 in a human PDA tissue sample. Scale bars, 100  $\mu$ m.  
**(D)** Immunofluorescence for CCL27 and insulin ( $\beta$ -cell marker) in a human PDA tissue sample. Scale bars, 100  $\mu$ m  
PDA= pancreatic ductal adenocarcinoma

Figure 3

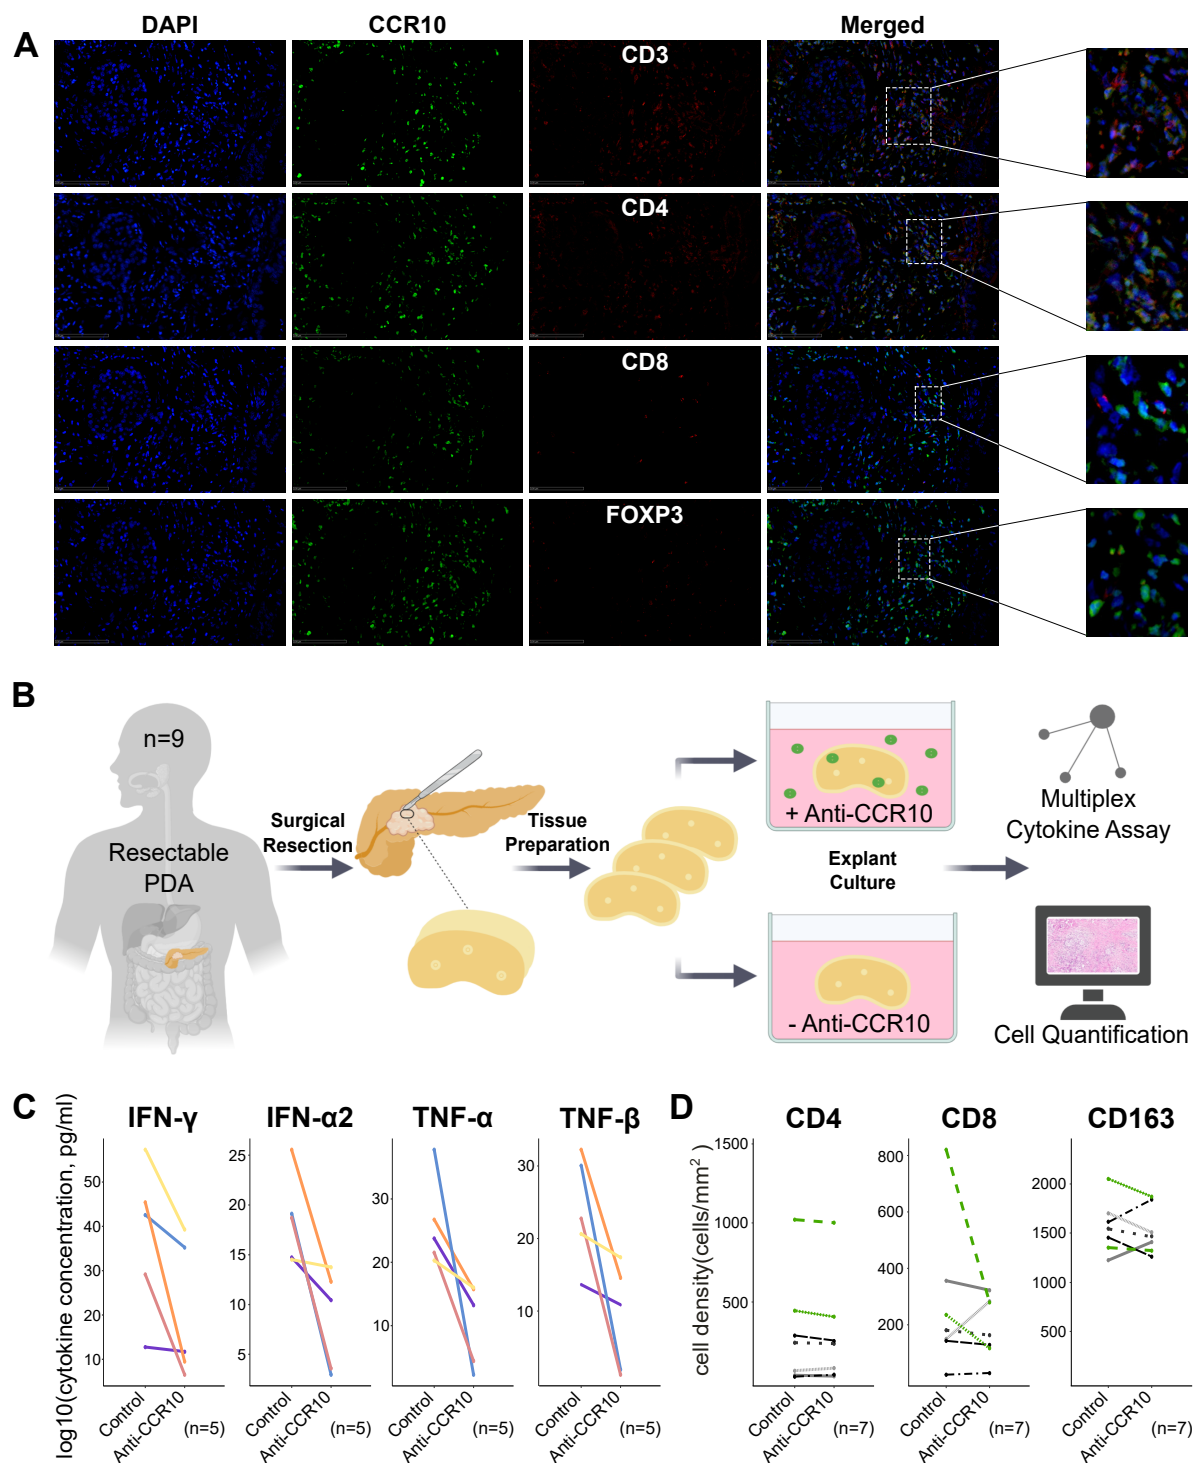

**Figure 3** CCR10 is expressed on CD4+ FoxP3+ T cells and selective inhibition of CCR10 abrogates the TH1-type cytokine profile

**(A)** Immunofluorescence of serial human PDA tissue samples as indicated. Scale bars, 100  $\mu$ m.

**(B)** Schematic overview of workflow as indicated.

**(C)** Cytokine alterations within the explant model after 24 hr using human PDA tissue samples. Data from five different patients is presented before and after treatment with the small molecule inhibitor of CCR10 (Anti-CCR10).

**(D)** Alteration of the intratumoral CD4+, CD8+ and CD163+ immune cell infiltration within the explant model using human PDA tissue samples. Data from seven different patients is presented before and after treatment with the small molecule inhibitor of CCR10 (Anti-CCR10). The two tissues with the highest absolute number of intratumoral CD4+ cells are indicated in green.

PDA= pancreatic ductal adenocarcinoma

See also Figure S3.



Figure 4

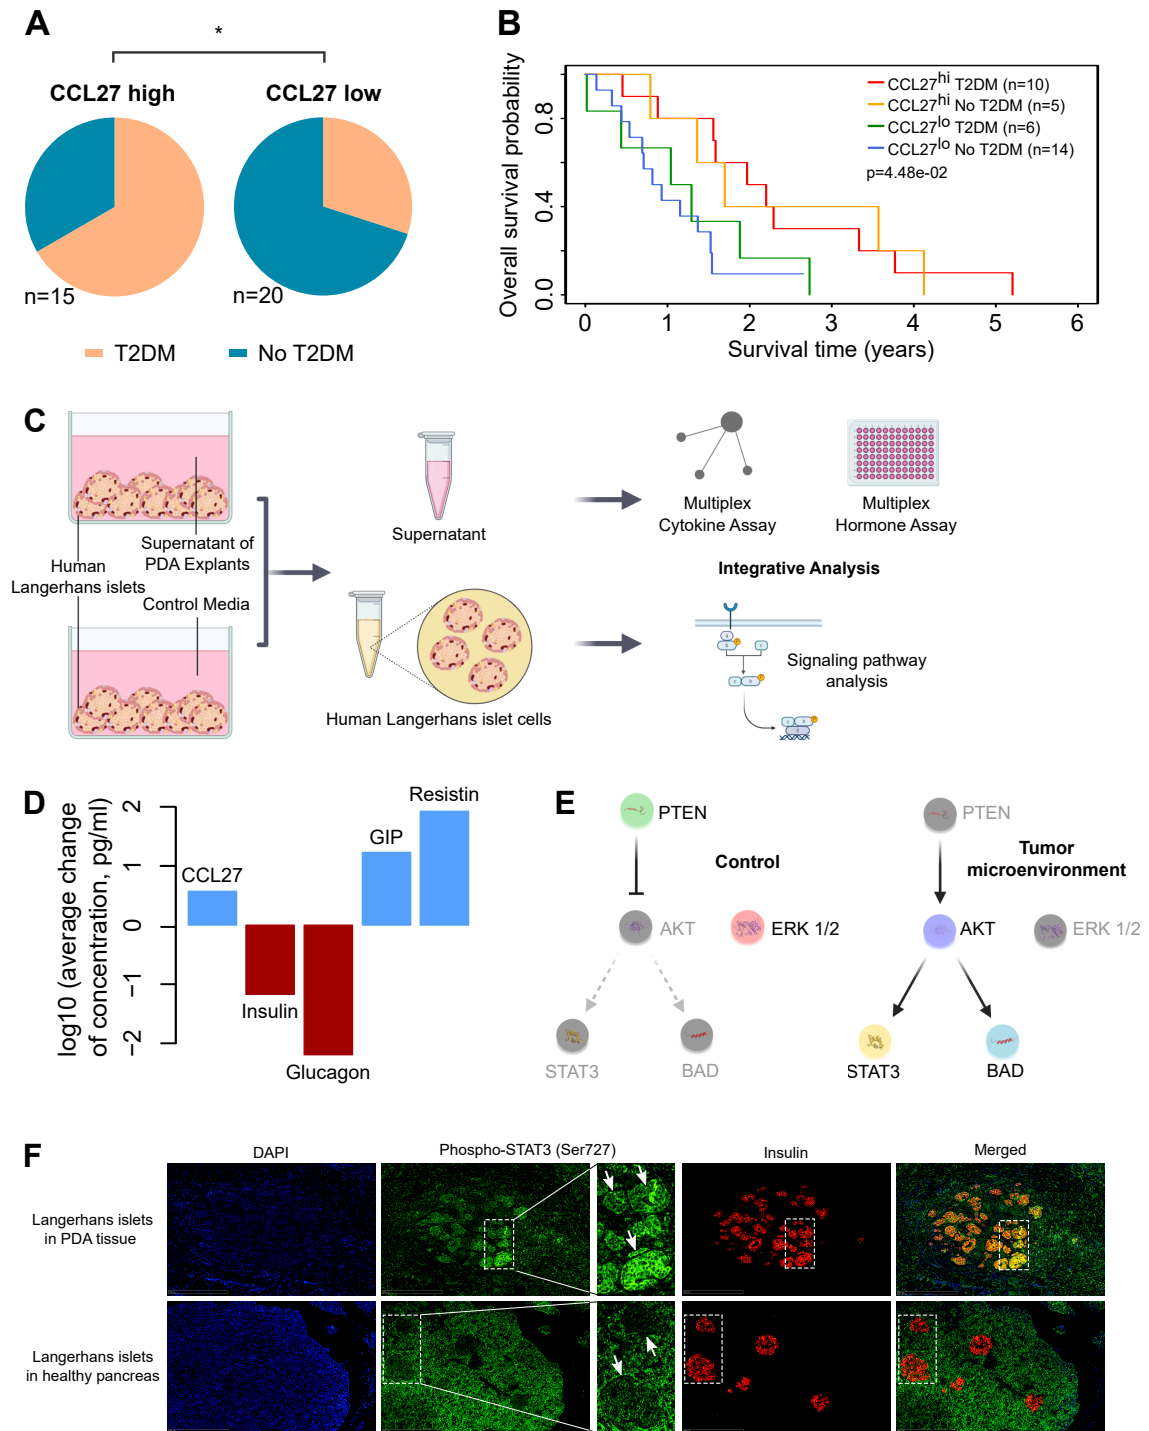

**Figure 4** Intratumoral Langerhans islet cells secrete CCL27 via STAT3 regulation and simultaneously downregulate insulin production

**(A)** Pie charts showing the distribution of PDA patients with diagnosis of diabetes prior to surgery. The patients were stratified into CCL27 high (hi) (n=15) and CCL27 low (lo) (n=20) group based on their intratumoral CCL27 concentration.

**(B)** Kaplan-Meier survival plot of patients based on combination of CCL27 (hi or lo) and T2DM (yes or no). The patients were stratified into CCL27 hi and CCL27 lo group based on their intratumoral CCL27 concentration. The data were analyzed using the log-rank test.

**(C)** Schematic overview of workflow as indicated.

**(D)** Alteration of indicated protein concentration expressed by human Langerhans islet cells after 48 hr culture in the supernatant of five different human PDA explants (representing five different human pancreatic tumor microenvironments). The expression profile was compared to human Langerhans islet cells cultured in control media for 48 hr.

**(E)** Schematic signaling effects of Langerhans islets cells in a pancreatic tumor microenvironment. Grey molecules are inactive and colored molecules are active.

**(F)** Immunofluorescence of human PDA tissue and healthy pancreas tissue as indicated. Arrows indicate Langerhans islets. Scale bars, 500  $\mu$ m.

T2DM= type 2 diabetes mellitus

PDA= pancreatic ductal adenocarcinoma

\* $p \leq 0.05$ .

See also Figure S4.



**Figure 5** T2DM and dynamic of HbA1c levels are markers for response to neoadjuvant chemotherapy

**(A)** Comparison between CCL27 high (hi) and CCL27 low (lo) group based on the number of chemotherapy cycles. Standard treatment regimen was FOLFIRINOX as neoadjuvant chemotherapy. The patients were stratified into CCL27 hi and CCL27 lo group based on their intratumoral CCL27 concentration (left). Correlation analysis showing the association of CCL27 concentrations with number of chemotherapy cycles. The analysis was performed using the Kendall rank correlation (right).

**(B)** Retrospective analysis performed on a total of 2264 patients. HbA1c levels (before and after FOLFIRINOX) were available from 122 patients who were treated with neoadjuvant chemotherapy. The pie charts are showing the distribution of PDA patients with diagnosis of T2DM at the beginning of neoadjuvant chemotherapy with FOLFIRINOX. The patients were stratified into Response to FOLFIRINOX (n=75) and No response to FOLFIRINOX (n=47). Comparison of HbA1c levels before and after FOLFIRINOX treatment in responders and non-responders. The course of HbA1c levels of individual patients are described as indicated (blue=increase, red=decrease, black=no change).

**(C)** Timeline describing the case of a patient as indicated.

\* $p \leq 0.05$ , \*\* $p \leq 0.005$ , \*\*\* $p \leq 0.0001$ .

a All PDA patients planned for pancreatoduodenectomy from 2016-2020 in the University Hospital Heidelberg were included.

b Response to FOLFIRINOX was assumed when the tumor was resectable. No response to FOLFIRINOX was assumed when the tumor remained irresectable.

Data are represented as mean  $\pm$  SEM and compared by two-sided Student's t test.

PDA= pancreatic ductal adenocarcinoma

T2DM= type 2 diabetes mellitus

FOLFIRINOX= fluorouracil, leucovorin, irinotecan and oxaliplatin

See also Figure S5.
